# Supplementary material
Source: publisher figshare collection journal article supplement (https://acs.figshare.com/ndownloader/files/3901561)
Supplement: Supplementary file 1 [file 3901561]

 
data_shelx
 
_audit_creation_method            SHELXL-97
_chemical_name_systematic
;
 ?
;
_chemical_name_common             ?
_chemical_melting_point           ?
_chemical_formula_moiety          ?
_chemical_formula_sum
 'C43 H49 N2 Ru Si'
_chemical_formula_weight          723.00
 
loop_
 _atom_type_symbol
 _atom_type_description
 _atom_type_scat_dispersion_real
 _atom_type_scat_dispersion_imag
 _atom_type_scat_source
 'C'  'C'   0.0033   0.0016
 'International Tables Vol C Tables 4.2.6.8 and 6.1.1.4'
 'H'  'H'   0.0000   0.0000
 'International Tables Vol C Tables 4.2.6.8 and 6.1.1.4'
 'N'  'N'   0.0061   0.0033
 'International Tables Vol C Tables 4.2.6.8 and 6.1.1.4'
 'Si'  'Si'   0.0817   0.0704
 'International Tables Vol C Tables 4.2.6.8 and 6.1.1.4'
 'Ru'  'Ru'  -1.2594   0.8363
 'International Tables Vol C Tables 4.2.6.8 and 6.1.1.4'
 
_symmetry_cell_setting            Monoclinic
_symmetry_space_group_name_H-M    P2(1)/c
 
loop_
 _symmetry_equiv_pos_as_xyz
 'x, y, z'
 '-x, y+1/2, -z+1/2'
 '-x, -y, -z'
 'x, -y-1/2, z-1/2'
 
_cell_length_a                    21.079(8)
_cell_length_b                    8.837(3)
_cell_length_c                    20.204(8)
_cell_angle_alpha                 90.00
_cell_angle_beta                  94.557(6)
_cell_angle_gamma                 90.00
_cell_volume                      3751(2)
_cell_formula_units_Z             4
_cell_measurement_temperature     100(2)
_cell_measurement_reflns_used     1804
_cell_measurement_theta_min       2.50
_cell_measurement_theta_max       23.96
 
_exptl_crystal_description        plate
_exptl_crystal_colour             colorless
_exptl_crystal_size_max           0.12
_exptl_crystal_size_mid           0.08
_exptl_crystal_size_min           0.03
_exptl_crystal_density_meas       ?
_exptl_crystal_density_diffrn     1.280
_exptl_crystal_density_method     'not measured'
_exptl_crystal_F_000              1516
_exptl_absorpt_coefficient_mu     0.481
_exptl_absorpt_correction_type    multi-scan
_exptl_absorpt_correction_T_min   0.9445
_exptl_absorpt_correction_T_max   0.9857
_exptl_absorpt_process_details    SADABS
 
_exptl_special_details
;
 ?
;
 
_diffrn_ambient_temperature       100(2)
_diffrn_radiation_wavelength      0.71073
_diffrn_radiation_type            MoK\a
_diffrn_radiation_source          'fine-focus sealed tube'
_diffrn_radiation_monochromator   graphite
_diffrn_measurement_device_type   'Bruker APEX-II CCD'
_diffrn_measurement_method        '\f and \w scans'
_diffrn_detector_area_resol_mean  8.366
_diffrn_reflns_number             18438
_diffrn_reflns_av_R_equivalents   0.2278
_diffrn_reflns_av_sigmaI/netI     0.3281
_diffrn_reflns_limit_h_min        -24
_diffrn_reflns_limit_h_max        25
_diffrn_reflns_limit_k_min        -10
_diffrn_reflns_limit_k_max        10
_diffrn_reflns_limit_l_min        -24
_diffrn_reflns_limit_l_max        14
_diffrn_reflns_theta_min          0.97
_diffrn_reflns_theta_max          25.44
_reflns_number_total              6845
_reflns_number_gt                 2756
_reflns_threshold_expression      >2sigma(I)
 
_computing_data_collection        'Bruker APEX2'
_computing_cell_refinement        'Bruker SAINT'
_computing_data_reduction         'Bruker SAINT'
_computing_structure_solution     'SHELXS-97 (Sheldrick, 2008)'
_computing_structure_refinement   'SHELXL-97 (Sheldrick, 2008)'
_computing_molecular_graphics     'ORTEP-32'
_computing_publication_material   'WinGx'
 
_refine_special_details
;
 Refinement of F^2^ against ALL reflections.  The weighted R-factor wR and
 goodness of fit S are based on F^2^, conventional R-factors R are based
 on F, with F set to zero for negative F^2^. The threshold expression of
 F^2^ > 2sigma(F^2^) is used only for calculating R-factors(gt) etc. and is
 not relevant to the choice of reflections for refinement.  R-factors based
 on F^2^ are statistically about twice as large as those based on F, and R-
 factors based on ALL data will be even larger.
;
 
_refine_ls_structure_factor_coef  Fsqd
_refine_ls_matrix_type            full
_refine_ls_weighting_scheme       calc
_refine_ls_weighting_details
 'calc w=1/[\s^2^(Fo^2^)+(0.0558P)^2^+0.0000P] where P=(Fo^2^+2Fc^2^)/3'
_atom_sites_solution_primary      direct
_atom_sites_solution_secondary    difmap
_atom_sites_solution_hydrogens    geom
_refine_ls_hydrogen_treatment     constr
_refine_ls_extinction_method      none
_refine_ls_extinction_coef        ?
_refine_ls_number_reflns          6845
_refine_ls_number_parameters      434
_refine_ls_number_restraints      6
_refine_ls_R_factor_all           0.2334
_refine_ls_R_factor_gt            0.0920
_refine_ls_wR_factor_ref          0.1942
_refine_ls_wR_factor_gt           0.1460
_refine_ls_goodness_of_fit_ref    0.923
_refine_ls_restrained_S_all       0.923
_refine_ls_shift/su_max           0.001
_refine_ls_shift/su_mean          0.000
 
loop_
 _atom_site_label
 _atom_site_type_symbol
 _atom_site_fract_x
 _atom_site_fract_y
 _atom_site_fract_z
 _atom_site_U_iso_or_equiv
 _atom_site_adp_type
 _atom_site_occupancy
 _atom_site_symmetry_multiplicity
 _atom_site_calc_flag
 _atom_site_refinement_flags
 _atom_site_disorder_assembly
 _atom_site_disorder_group
C1 C 0.2544(5) 0.1590(9) 0.2858(5) 0.017(2) Uani 1 1 d . . .
C2 C 0.1385(5) 0.2172(11) 0.2906(5) 0.024(3) Uani 1 1 d . . .
C3 C 0.1355(5) 0.2967(11) 0.2299(5) 0.022(3) Uani 1 1 d . . .
C4 C 0.1935(5) 0.3356(11) 0.1974(5) 0.028(3) Uani 1 1 d . . .
H4A H 0.2186 0.4111 0.2246 0.034 Uiso 1 1 calc R . .
H4B H 0.1817 0.3808 0.1533 0.034 Uiso 1 1 calc R . .
C5 C 0.0755(5) 0.3301(10) 0.2020(5) 0.022(3) Uani 1 1 d . . .
H5 H 0.0716 0.3841 0.1612 0.027 Uiso 1 1 calc R . .
C6 C 0.0214(5) 0.2892(12) 0.2303(6) 0.035(3) Uani 1 1 d . . .
H6 H -0.0193 0.3178 0.2106 0.042 Uiso 1 1 calc R . .
C7 C 0.0271(5) 0.2050(12) 0.2882(5) 0.028(3) Uani 1 1 d . . .
H7 H -0.0104 0.1716 0.3068 0.034 Uiso 1 1 calc R . .
C8 C 0.0860(5) 0.1674(10) 0.3205(5) 0.021(3) Uani 1 1 d . . .
C9 C 0.0881(5) 0.0718(12) 0.3818(5) 0.036(3) Uani 1 1 d . . .
H9A H 0.1222 -0.0033 0.3805 0.053 Uiso 1 1 calc R . .
H9B H 0.0472 0.0199 0.3840 0.053 Uiso 1 1 calc R . .
H9C H 0.0962 0.1363 0.4210 0.053 Uiso 1 1 calc R . .
C10 C 0.2212(6) 0.2159(12) 0.3871(5) 0.031(3) Uani 1 1 d . . .
H10 H 0.1940 0.2412 0.4208 0.037 Uiso 1 1 calc R . .
C11 C 0.2846(6) 0.1983(13) 0.3954(5) 0.038(3) Uani 1 1 d . . .
H11 H 0.3108 0.2080 0.4357 0.045 Uiso 1 1 calc R . .
C12 C 0.3698(5) 0.1529(11) 0.3246(5) 0.024(3) Uani 1 1 d . . .
C13 C 0.4008(5) 0.0120(11) 0.3282(5) 0.019(3) Uani 1 1 d . . .
C14 C 0.3625(5) -0.1304(11) 0.3389(5) 0.036(3) Uani 1 1 d . . .
H14A H 0.3459 -0.1268 0.3829 0.053 Uiso 1 1 calc R . .
H14B H 0.3899 -0.2194 0.3361 0.053 Uiso 1 1 calc R . .
H14C H 0.3269 -0.1369 0.3047 0.053 Uiso 1 1 calc R . .
C15 C 0.4661(5) 0.0092(11) 0.3213(5) 0.029(3) Uani 1 1 d . . .
H15 H 0.4875 -0.0855 0.3219 0.034 Uiso 1 1 calc R . .
C16 C 0.5004(5) 0.1393(13) 0.3136(5) 0.035(3) Uani 1 1 d . . .
H16 H 0.5449 0.1344 0.3097 0.042 Uiso 1 1 calc R . .
C17 C 0.4695(6) 0.2778(12) 0.3117(5) 0.037(3) Uani 1 1 d . . .
H17 H 0.4931 0.3679 0.3061 0.044 Uiso 1 1 calc R . .
C18 C 0.4049(6) 0.2865(13) 0.3178(5) 0.032(3) Uani 1 1 d . . .
C19 C 0.3723(6) 0.4403(11) 0.3207(6) 0.047(4) Uani 1 1 d . . .
H19A H 0.3641 0.4630 0.3667 0.071 Uiso 1 1 calc R . .
H19B H 0.3319 0.4381 0.2931 0.071 Uiso 1 1 calc R . .
H19C H 0.3999 0.5186 0.3042 0.071 Uiso 1 1 calc R . .
C20 C 0.2207(5) -0.1184(11) 0.1805(4) 0.023(3) Uani 1 1 d . . .
C21 C 0.2737(5) -0.1001(11) 0.1409(5) 0.022(3) Uani 1 1 d . . .
C22 C 0.2525(5) 0.0073(12) 0.0889(5) 0.028(3) Uani 1 1 d . . .
C23 C 0.1895(5) 0.0525(10) 0.0981(4) 0.015(2) Uani 1 1 d . . .
C24 C 0.1693(5) -0.0263(10) 0.1547(5) 0.019(2) Uani 1 1 d . . .
C25 C 0.2186(5) -0.2316(11) 0.2356(5) 0.034(3) Uani 1 1 d . . .
H25A H 0.2097 -0.1794 0.2766 0.052 Uiso 1 1 calc R . .
H25B H 0.2597 -0.2834 0.2421 0.052 Uiso 1 1 calc R . .
H25C H 0.1850 -0.3059 0.2240 0.052 Uiso 1 1 calc R . .
C26 C 0.3363(5) -0.1805(11) 0.1461(5) 0.034(3) Uani 1 1 d . . .
H26A H 0.3464 -0.2139 0.1920 0.051 Uiso 1 1 calc R . .
H26B H 0.3696 -0.1116 0.1332 0.051 Uiso 1 1 calc R . .
H26C H 0.3339 -0.2686 0.1166 0.051 Uiso 1 1 calc R . .
C27 C 0.2877(5) 0.0406(12) 0.0288(5) 0.039(3) Uani 1 1 d . . .
H27A H 0.2771 -0.0362 -0.0053 0.059 Uiso 1 1 calc R . .
H27B H 0.3336 0.0390 0.0411 0.059 Uiso 1 1 calc R . .
H27C H 0.2753 0.1408 0.0113 0.059 Uiso 1 1 calc R . .
C28 C 0.1479(5) 0.1513(12) 0.0529(5) 0.030(3) Uani 1 1 d . . .
H28A H 0.1725 0.2384 0.0391 0.045 Uiso 1 1 calc R . .
H28B H 0.1118 0.1871 0.0764 0.045 Uiso 1 1 calc R . .
H28C H 0.1321 0.0933 0.0137 0.045 Uiso 1 1 calc R . .
C29 C 0.1027(5) -0.0447(11) 0.1753(5) 0.032(3) Uani 1 1 d . . .
H29A H 0.0817 -0.1283 0.1503 0.048 Uiso 1 1 calc R . .
H29B H 0.0788 0.0490 0.1660 0.048 Uiso 1 1 calc R . .
H29C H 0.1043 -0.0669 0.2229 0.048 Uiso 1 1 calc R . .
C30 C 0.3850(5) 0.2926(10) 0.1022(5) 0.022(3) Uani 1 1 d . . .
C31 C 0.4306(5) 0.1852(12) 0.1239(5) 0.029(3) Uani 1 1 d . . .
H31 H 0.4242 0.1287 0.1628 0.034 Uiso 1 1 calc R . .
C32 C 0.4842(5) 0.1575(11) 0.0913(5) 0.024(3) Uani 1 1 d . . .
H32 H 0.5143 0.0851 0.1088 0.029 Uiso 1 1 calc R . .
C33 C 0.4951(5) 0.2351(12) 0.0324(5) 0.029(3) Uani 1 1 d . . .
C34 C 0.5543(5) 0.2024(12) -0.0032(5) 0.035(3) Uani 1 1 d . . .
H34A H 0.5430 0.1966 -0.0511 0.052 Uiso 1 1 calc R . .
H34B H 0.5728 0.1059 0.0125 0.052 Uiso 1 1 calc R . .
H34C H 0.5854 0.2837 0.0061 0.052 Uiso 1 1 calc R . .
C35 C 0.4513(5) 0.3419(11) 0.0104(5) 0.026(3) Uani 1 1 d . . .
H35 H 0.4580 0.3980 -0.0286 0.032 Uiso 1 1 calc R . .
C36 C 0.3969(4) 0.3701(12) 0.0441(5) 0.024(2) Uani 1 1 d . . .
H36 H 0.3672 0.4439 0.0269 0.029 Uiso 1 1 calc R . .
C50 C 0.8652(11) 0.2525(15) 0.0160(8) 0.078(6) Uani 1 1 d U . .
C51 C 0.9288(9) 0.2029(15) 0.0175(7) 0.065(5) Uani 1 1 d . . .
H51 H 0.9550 0.2352 -0.0159 0.079 Uiso 1 1 calc R . .
C52 C 0.9526(6) 0.1098(16) 0.0662(8) 0.056(4) Uani 1 1 d . . .
H52 H 0.9956 0.0773 0.0665 0.067 Uiso 1 1 calc R . .
C53 C 0.9165(9) 0.0619(14) 0.1144(7) 0.059(4) Uani 1 1 d . . .
H53 H 0.9339 -0.0040 0.1483 0.071 Uiso 1 1 calc R . .
C54 C 0.8576(9) 0.1070(19) 0.1140(8) 0.073(5) Uani 1 1 d . . .
H54 H 0.8329 0.0717 0.1482 0.087 Uiso 1 1 calc R . .
C55 C 0.8288(7) 0.204(2) 0.0666(11) 0.089(7) Uani 1 1 d . . .
H55 H 0.7859 0.2352 0.0684 0.107 Uiso 1 1 calc R . .
C56 C 0.8377(11) 0.3553(17) -0.0329(9) 0.216(14) Uani 1 1 d . . .
H56A H 0.7969 0.3147 -0.0519 0.324 Uiso 1 1 calc R . .
H56B H 0.8666 0.3679 -0.0682 0.324 Uiso 1 1 calc R . .
H56C H 0.8307 0.4535 -0.0122 0.324 Uiso 1 1 calc R . .
N1 N 0.2020(4) 0.1906(8) 0.3203(4) 0.021(2) Uani 1 1 d . . .
N2 N 0.3037(4) 0.1636(9) 0.3340(4) 0.020(2) Uani 1 1 d . . .
Si1 Si 0.30768(15) 0.3296(3) 0.14032(16) 0.0291(8) Uani 1 1 d . . .
Ru1 Ru 0.25090(4) 0.13126(9) 0.18590(4) 0.0201(2) Uani 1 1 d . . .
 
loop_
 _atom_site_aniso_label
 _atom_site_aniso_U_11
 _atom_site_aniso_U_22
 _atom_site_aniso_U_33
 _atom_site_aniso_U_23
 _atom_site_aniso_U_13
 _atom_site_aniso_U_12
C1 0.023(6) 0.006(5) 0.019(5) 0.008(4) -0.012(5) -0.006(4)
C2 0.028(7) 0.021(6) 0.022(6) 0.003(5) -0.005(5) -0.002(5)
C3 0.033(7) 0.011(5) 0.023(6) -0.002(5) 0.000(5) -0.005(5)
C4 0.032(7) 0.024(7) 0.029(6) 0.008(5) 0.008(5) 0.010(5)
C5 0.023(6) 0.017(6) 0.026(6) 0.001(5) 0.000(5) 0.002(5)
C6 0.033(8) 0.033(7) 0.038(8) 0.002(6) -0.001(6) 0.013(6)
C7 0.025(7) 0.030(6) 0.031(7) -0.013(6) 0.009(6) -0.001(6)
C8 0.039(7) 0.008(5) 0.015(6) -0.001(5) 0.006(5) 0.004(5)
C9 0.046(8) 0.033(6) 0.029(7) 0.003(6) 0.010(6) 0.017(6)
C10 0.051(9) 0.038(7) 0.003(6) 0.004(5) 0.003(6) 0.019(6)
C11 0.045(8) 0.048(8) 0.020(7) -0.005(6) -0.001(6) 0.013(7)
C12 0.045(8) 0.019(6) 0.009(5) 0.001(5) -0.001(5) 0.009(6)
C13 0.024(7) 0.020(6) 0.011(6) 0.000(5) -0.010(5) 0.002(5)
C14 0.045(7) 0.011(5) 0.049(7) 0.001(7) -0.009(6) 0.001(6)
C15 0.036(8) 0.013(6) 0.035(7) -0.011(5) -0.010(6) 0.001(5)
C16 0.038(7) 0.034(7) 0.032(7) -0.010(7) -0.001(5) -0.002(7)
C17 0.057(9) 0.017(6) 0.035(8) 0.001(6) -0.006(7) -0.009(6)
C18 0.042(9) 0.025(6) 0.028(7) 0.002(6) 0.000(6) 0.002(6)
C19 0.070(10) 0.010(5) 0.058(9) -0.004(6) -0.023(7) 0.003(6)
C20 0.053(7) 0.012(5) 0.007(5) -0.004(5) 0.011(5) -0.015(6)
C21 0.039(7) 0.016(6) 0.012(6) -0.005(5) 0.003(5) -0.003(5)
C22 0.040(8) 0.031(7) 0.016(6) -0.004(5) 0.012(6) -0.008(6)
C23 0.018(6) 0.012(5) 0.013(6) -0.004(5) 0.000(5) -0.005(5)
C24 0.031(7) 0.011(5) 0.016(6) 0.005(5) -0.001(5) 0.002(5)
C25 0.061(9) 0.017(6) 0.027(7) 0.012(5) 0.015(6) -0.013(6)
C26 0.039(7) 0.016(6) 0.048(8) -0.008(6) 0.013(6) 0.002(5)
C27 0.064(9) 0.040(7) 0.017(6) -0.012(6) 0.017(6) -0.021(7)
C28 0.041(7) 0.027(7) 0.022(6) 0.006(6) 0.002(5) -0.001(6)
C29 0.033(7) 0.026(6) 0.038(7) -0.014(6) 0.010(6) -0.012(6)
C30 0.040(7) 0.010(5) 0.014(6) -0.005(5) -0.001(5) -0.002(5)
C31 0.037(7) 0.030(6) 0.019(6) 0.003(5) 0.007(6) -0.006(6)
C32 0.034(7) 0.018(6) 0.021(6) -0.002(5) 0.000(5) 0.004(5)
C33 0.033(7) 0.027(6) 0.029(7) -0.011(6) 0.006(6) -0.010(6)
C34 0.050(8) 0.030(6) 0.025(7) -0.001(6) 0.006(6) -0.006(6)
C35 0.041(7) 0.020(6) 0.017(6) 0.004(5) -0.003(5) -0.013(6)
C36 0.023(6) 0.019(5) 0.029(6) 0.016(6) -0.004(5) -0.001(6)
C50 0.146(18) 0.026(8) 0.049(11) 0.003(8) -0.081(11) 0.014(10)
C51 0.119(15) 0.037(8) 0.035(9) -0.009(8) -0.028(9) -0.026(9)
C52 0.042(9) 0.055(10) 0.068(10) -0.035(9) -0.011(8) -0.001(8)
C53 0.108(15) 0.030(8) 0.038(9) -0.014(7) -0.004(10) -0.001(9)
C54 0.085(13) 0.055(11) 0.084(13) -0.042(10) 0.042(11) -0.026(10)
C55 0.054(11) 0.066(12) 0.140(19) -0.085(13) -0.034(12) 0.029(10)
C56 0.40(3) 0.037(10) 0.167(18) -0.036(13) -0.23(2) 0.057(17)
N1 0.040(6) 0.014(4) 0.009(5) -0.005(4) 0.007(4) 0.001(4)
N2 0.018(5) 0.027(5) 0.016(5) -0.004(4) 0.001(4) 0.000(4)
Si1 0.036(2) 0.0145(16) 0.038(2) 0.0080(15) 0.0092(16) 0.0006(14)
Ru1 0.0351(5) 0.0092(4) 0.0160(4) 0.0001(5) 0.0018(4) -0.0010(5)
 
_geom_special_details
;
 All esds (except the esd in the dihedral angle between two l.s. planes)
 are estimated using the full covariance matrix.  The cell esds are taken
 into account individually in the estimation of esds in distances, angles
 and torsion angles; correlations between esds in cell parameters are only
 used when they are defined by crystal symmetry.  An approximate (isotropic)
 treatment of cell esds is used for estimating esds involving l.s. planes.
;
 
loop_
 _geom_bond_atom_site_label_1
 _geom_bond_atom_site_label_2
 _geom_bond_distance
 _geom_bond_site_symmetry_2
 _geom_bond_publ_flag
C1 N2 1.368(11) . ?
C1 N1 1.380(11) . ?
C1 Ru1 2.029(9) . ?
C2 C8 1.374(13) . ?
C2 C3 1.410(13) . ?
C2 N1 1.442(12) . ?
C3 C5 1.376(13) . ?
C3 C4 1.472(13) . ?
C4 Ru1 2.197(9) . ?
C5 C6 1.365(13) . ?
C6 C7 1.384(13) . ?
C7 C8 1.395(13) . ?
C8 C9 1.498(12) . ?
C10 C11 1.343(14) . ?
C10 N1 1.396(11) . ?
C11 N2 1.369(11) . ?
C12 C13 1.405(13) . ?
C12 C18 1.406(14) . ?
C12 N2 1.424(12) . ?
C13 C15 1.394(13) . ?
C13 C14 1.520(13) . ?
C15 C16 1.374(13) . ?
C16 C17 1.385(14) . ?
C17 C18 1.379(15) . ?
C18 C19 1.527(13) . ?
C20 C24 1.420(13) . ?
C20 C21 1.433(12) . ?
C20 C25 1.500(12) . ?
C20 Ru1 2.296(10) . ?
C21 C22 1.459(13) . ?
C21 C26 1.495(13) . ?
C21 Ru1 2.303(9) . ?
C22 C23 1.412(13) . ?
C22 C27 1.503(12) . ?
C22 Ru1 2.247(10) . ?
C23 C24 1.432(12) . ?
C23 C28 1.497(12) . ?
C23 Ru1 2.222(9) . ?
C24 C29 1.504(13) . ?
C24 Ru1 2.263(10) . ?
C30 C31 1.395(13) . ?
C30 C36 1.400(12) . ?
C30 Si1 1.886(11) . ?
C31 C32 1.374(13) . ?
C32 C33 1.409(13) . ?
C33 C35 1.369(13) . ?
C33 C34 1.517(13) . ?
C35 C36 1.403(13) . ?
C50 C55 1.39(2) . ?
C50 C51 1.41(2) . ?
C50 C56 1.432(18) . ?
C51 C52 1.348(17) . ?
C52 C53 1.352(17) . ?
C53 C54 1.304(18) . ?
C54 C55 1.39(2) . ?
Si1 Ru1 2.351(3) . ?
 
loop_
 _geom_angle_atom_site_label_1
 _geom_angle_atom_site_label_2
 _geom_angle_atom_site_label_3
 _geom_angle
 _geom_angle_site_symmetry_1
 _geom_angle_site_symmetry_3
 _geom_angle_publ_flag
N2 C1 N1 103.2(8) . . ?
N2 C1 Ru1 132.6(7) . . ?
N1 C1 Ru1 124.0(7) . . ?
C8 C2 C3 124.1(10) . . ?
C8 C2 N1 121.2(9) . . ?
C3 C2 N1 114.7(9) . . ?
C5 C3 C2 116.0(10) . . ?
C5 C3 C4 122.4(9) . . ?
C2 C3 C4 121.5(10) . . ?
C3 C4 Ru1 109.8(7) . . ?
C6 C5 C3 123.0(10) . . ?
C5 C6 C7 118.5(10) . . ?
C6 C7 C8 122.5(10) . . ?
C2 C8 C7 115.9(9) . . ?
C2 C8 C9 124.9(10) . . ?
C7 C8 C9 119.1(10) . . ?
C11 C10 N1 108.1(9) . . ?
C10 C11 N2 106.0(9) . . ?
C13 C12 C18 120.2(10) . . ?
C13 C12 N2 120.5(9) . . ?
C18 C12 N2 119.0(9) . . ?
C15 C13 C12 117.9(10) . . ?
C15 C13 C14 122.6(9) . . ?
C12 C13 C14 119.4(9) . . ?
C16 C15 C13 121.9(10) . . ?
C15 C16 C17 119.5(10) . . ?
C18 C17 C16 120.7(11) . . ?
C17 C18 C12 119.6(11) . . ?
C17 C18 C19 120.2(10) . . ?
C12 C18 C19 120.1(10) . . ?
C24 C20 C21 109.7(8) . . ?
C24 C20 C25 125.9(9) . . ?
C21 C20 C25 124.1(10) . . ?
C24 C20 Ru1 70.6(6) . . ?
C21 C20 Ru1 72.1(5) . . ?
C25 C20 Ru1 129.0(6) . . ?
C20 C21 C22 105.5(9) . . ?
C20 C21 C26 129.0(9) . . ?
C22 C21 C26 125.3(9) . . ?
C20 C21 Ru1 71.6(6) . . ?
C22 C21 Ru1 69.2(5) . . ?
C26 C21 Ru1 127.2(7) . . ?
C23 C22 C21 109.1(9) . . ?
C23 C22 C27 125.5(10) . . ?
C21 C22 C27 124.5(10) . . ?
C23 C22 Ru1 70.6(5) . . ?
C21 C22 Ru1 73.4(5) . . ?
C27 C22 Ru1 130.7(7) . . ?
C22 C23 C24 108.0(9) . . ?
C22 C23 C28 126.6(9) . . ?
C24 C23 C28 125.0(9) . . ?
C22 C23 Ru1 72.6(6) . . ?
C24 C23 Ru1 72.9(5) . . ?
C28 C23 Ru1 125.5(6) . . ?
C20 C24 C23 107.7(9) . . ?
C20 C24 C29 122.6(9) . . ?
C23 C24 C29 128.0(9) . . ?
C20 C24 Ru1 73.1(6) . . ?
C23 C24 Ru1 69.8(5) . . ?
C29 C24 Ru1 134.0(7) . . ?
C31 C30 C36 115.6(9) . . ?
C31 C30 Si1 125.9(8) . . ?
C36 C30 Si1 118.4(8) . . ?
C32 C31 C30 122.9(10) . . ?
C31 C32 C33 120.9(10) . . ?
C35 C33 C32 117.3(10) . . ?
C35 C33 C34 122.4(10) . . ?
C32 C33 C34 120.2(10) . . ?
C33 C35 C36 121.4(10) . . ?
C30 C36 C35 121.9(9) . . ?
C55 C50 C51 117.8(14) . . ?
C55 C50 C56 119(2) . . ?
C51 C50 C56 123(2) . . ?
C52 C51 C50 120.3(15) . . ?
C51 C52 C53 121.2(14) . . ?
C54 C53 C52 119.3(15) . . ?
C53 C54 C55 123.9(16) . . ?
C54 C55 C50 117.4(15) . . ?
C1 N1 C10 109.8(9) . . ?
C1 N1 C2 125.2(8) . . ?
C10 N1 C2 124.3(9) . . ?
C1 N2 C11 112.9(9) . . ?
C1 N2 C12 126.8(8) . . ?
C11 N2 C12 119.9(8) . . ?
C30 Si1 Ru1 120.9(3) . . ?
C1 Ru1 C4 76.8(4) . . ?
C1 Ru1 C23 143.6(4) . . ?
C4 Ru1 C23 92.9(4) . . ?
C1 Ru1 C22 157.6(4) . . ?
C4 Ru1 C22 122.7(4) . . ?
C23 Ru1 C22 36.8(3) . . ?
C1 Ru1 C24 108.5(3) . . ?
C4 Ru1 C24 97.0(4) . . ?
C23 Ru1 C24 37.2(3) . . ?
C22 Ru1 C24 61.4(4) . . ?
C1 Ru1 C20 98.7(3) . . ?
C4 Ru1 C20 129.9(4) . . ?
C23 Ru1 C20 61.3(3) . . ?
C22 Ru1 C20 60.9(3) . . ?
C24 Ru1 C20 36.3(3) . . ?
C1 Ru1 C21 120.5(3) . . ?
C4 Ru1 C21 154.9(4) . . ?
C23 Ru1 C21 62.2(3) . . ?
C22 Ru1 C21 37.4(3) . . ?
C24 Ru1 C21 61.4(3) . . ?
C20 Ru1 C21 36.3(3) . . ?
C1 Ru1 Si1 108.7(3) . . ?
C4 Ru1 Si1 74.4(3) . . ?
C23 Ru1 Si1 101.7(2) . . ?
C22 Ru1 Si1 88.8(3) . . ?
C24 Ru1 Si1 138.5(3) . . ?
C20 Ru1 Si1 147.7(2) . . ?
C21 Ru1 Si1 112.2(3) . . ?
 
_diffrn_measured_fraction_theta_max    0.985
_diffrn_reflns_theta_full              25.00
_diffrn_measured_fraction_theta_full   0.995
_refine_diff_density_max    0.861
_refine_diff_density_min   -1.300
_refine_diff_density_rms    0.139
